# Supplementary material
Source: PubMed Central journal article supplement (PMC4304024)
Supplement: jn.114.200238_nutrition200238SupplementaryData1.pdf [file jn.114.200238_nutrition200238SupplementaryData1.pdf]

Supplemental Table 1: Composition of lycopene placebo beadlet<sup>1</sup>

| Ingredients:                     | Composition, % |
|----------------------------------|----------------|
| Gelatin                          | 25-35          |
| Sucrose                          | 20-35          |
| Corn Starch                      | 20-30          |
| Sodium Ascorbate                 | 0.5-2.5        |
| d,1- $\alpha$ -tocopherol (E307) | 0.5-2.0        |
| Ascorbyl Palmitate (E304)        | 0.1-1.2        |
| Tri-calcium phosphate (E341)     | 0.4-0.6        |
| Water                            | 2-5            |

<sup>1</sup> BASF, Ludwigshafen, Germany

Online Supporting Material

Supplemental Table 2: Primers sequences for RT-PCR analysis of liver and mesenteric adipose tissue from BCO2-KO mice

| Genes:         | Forward:                        | Reverse:                   |
|----------------|---------------------------------|----------------------------|
| <i>Abca1</i>   | Qiagen QuantiTech Primer Assay: | QT00165690                 |
| <i>Abcb11</i>  | TCTGACTCAGTGATTCTTCGCA          | CCCATAAACATCAGCCAGTTGT     |
| <i>Abcg1</i>   | Qiagen QuantiTech Primer Assay: | QT00113519                 |
| <i>Abcg5</i>   | AGGGCCTCACATCAACAGAG            | GCTGACGCTGTAGGACACAT       |
| <i>Abcg8</i>   | CTGTGGAATGGGACTGTACTTC          | GTTGGACTGACCACTGTAGGT      |
| <i>Acad-M</i>  | AGGGTTTAGTTTTGAGTTGACGG         | CCCCGCTTTTGTTCATATTCCG     |
| <i>Acad-VL</i> | CTACTGTGCTTCAGGGACAAC           | CAAAGGACTTCGATTCTGCCC      |
| <i>Acox1</i>   | TAACCTCCTCACTCGAAGCCA           | AGTTCCATGACCCATCTCTGTC     |
| <i>ApoB</i>    | TTGGCAAACATGCATAGCATCC          | TCAAATTGGGACTCTCCTTTAGC    |
| <i>β-Actin</i> | CTTTTCCAGCCTTCCTTCTTGG          | CAGCACTGTGTTGGCATAGAGG     |
| <i>Cd36</i>    | GCGACATGATTAATGGCACA            | CCTGCAAATGTCAGAGGAAA       |
| <i>Cidea</i>   | TGACATTCATGGGATTGCAGAC          | GGCCAGTTGTGATGACTAAGAC     |
| <i>Cyp7a1</i>  | GGGATTGCTGTGGTAGTGAGC           | GGTATGGAATCAACCCGTTGTC     |
| <i>Cyp8b1</i>  | CCTCTGGACAAGGGTTTTGTG           | GCACCGTGAAGACATCCCC        |
| <i>Cytc</i>    | CCAAATCTCCACGGTCTGTTT           | ATCAGGGTATCCTCTCCCCAG      |
| <i>Dgat1</i>   | TCCGTCCAGGGTGGTAGTG             | TGAACAAAGAATCTTGCAGACGA    |
| <i>Fatp1</i>   | CGCTTTCTGCGTATCGTCTG            | GATGCACGGGATCGTGTCT        |
| <i>Fatp2</i>   | TCCTCCAAGATGTGCGGACT            | TAGGTGAGCGTCTCGTCTCG       |
| <i>Fatp4</i>   | ACTGTTCTCCAAGCTAGTGCT           | GATGAAGACCCGGATGAAACG      |
| <i>Fatp5</i>   | TCTATGGCCTAAAGTTCAGGCG          | CTTGCCGCTCTAAAGCATCC       |
| <i>Hsl</i>     | CCAGCCTGAGGGCTTACTG             | CTCCATTGACTGTGACATCTCG     |
| <i>Lpl</i>     | GGGAGTTTGGCTCCAGAGTTT           | TGTGTCTTCAGGGGTCCTTAG      |
| <i>Mgl1</i>    | CGGACTTCCAAGTTTTTGTGAGA         | GCAGCCACTAGGATGGAGATG      |
| <i>Pck1</i>    | CTGCATAACGGTCTGGACTTC           | CAGCAACTGCCCCGACTCC        |
| <i>Pgc1α</i>   | TATGGAGTGACATAGAGTGTGCT         | CCACTTCAATCCACCCAGAAAAG    |
| <i>Pnpla2</i>  | GGATGGCGGCATTTTCAGACA           | CAAAGGGTTGGGTTGGTTCAG      |
| <i>PPARα</i>   | GTACCACTACGGAGTTCACGCA          | CATTGTGTGACATCCCGACAG      |
| <i>PPARγ</i>   | GGATAAAGCATCAGGCTTCCAC          | AACCTGATGGCATTGTGAGACA     |
| <i>Prdm16</i>  | CCACCAGCGAGGACTTCAC             | GGAGGACTCTCGTAGCTCGAA      |
| <i>Slc2a4</i>  | GTGACTGGAACACTGGTCCTA           | CCAGCCACGTTGCATTGTAG       |
| <i>Scd</i>     | CCGGAGACCCCTTAGATCGA            | TAGCCTGTAAAAGATTTCTGCAAACC |
| <i>Ucp1</i>    | AGGCTTCCAGTACCATTAGGT           | CTGAGTGAGGCAAAGCTGATTT     |
| <i>Ucp3</i>    | CTGCACCGCCAGATGAGTTT            | ATCATGGCTTCAAATCGGACC      |

Online Supporting Material

Supplemental Table 3: Spearman's rank correlation of PPAR $\alpha$ -associated genes in mesenteric adipose tissue of BCO2-KO mice.<sup>1</sup>

| $R^2$                          | <i>Acad-M</i> | <i>Acad-VL</i> | <i>Acox1</i> | <i>Cd36</i> | <i>Fatp1</i> | <i>Fatp4</i> | <i>Hsl</i>  | <i>Lpl</i>  | <i>MglI</i> | <i>Pnpla2</i> | <i>PPAR<math>\alpha</math></i> |
|--------------------------------|---------------|----------------|--------------|-------------|--------------|--------------|-------------|-------------|-------------|---------------|--------------------------------|
| <i>Acad-M</i>                  | 1.00          |                |              |             |              |              |             |             |             |               |                                |
| <i>Acad-VL</i>                 | 0.64<br>***   | 1.00           |              |             |              |              |             |             |             |               |                                |
| <i>Acox1</i>                   | 0.53<br>***   | 0.78<br>***    | 1.00         |             |              |              |             |             |             |               |                                |
| <i>Cd36</i>                    | 0.65<br>***   | 0.82<br>***    | 0.89<br>***  | 1.00        |              |              |             |             |             |               |                                |
| <i>Fatp1</i>                   | 0.69<br>***   | 0.83<br>***    | 0.89<br>***  | 0.80<br>*** | 1.00         |              |             |             |             |               |                                |
| <i>Fatp4</i>                   | 0.54<br>***   | 0.80<br>***    | 0.59<br>***  | 0.73<br>*** | 0.58<br>***  | 1.00         |             |             |             |               |                                |
| <i>Hsl</i>                     | 0.39<br>**    | 0.77<br>***    | 0.90<br>***  | 0.88<br>*** | 0.74<br>***  | 0.66<br>***  | 1.00        |             |             |               |                                |
| <i>Lpl</i>                     | 0.11          | 0.18           | 0.15         | 0.09        | 0.06         | 0.11         | 0.12        | 1.00        |             |               |                                |
| <i>MglI</i>                    | 0.39<br>**    | 0.79<br>***    | 0.88<br>***  | 0.85<br>*** | 0.76<br>***  | 0.73<br>***  | 0.95<br>*** | 0.07<br>*** | 1.00        |               |                                |
| <i>Pnpla2</i>                  | 0.53<br>***   | 0.76<br>***    | 0.96<br>***  | 0.87<br>*** | 0.88<br>***  | 0.53<br>***  | 0.87<br>*** | 0.13<br>*** | 0.86<br>*** | 1.00          |                                |
| <i>PPAR<math>\alpha</math></i> | 0.26          | 0.60<br>***    | 0.65<br>***  | 0.66<br>*** | 0.56<br>***  | 0.52<br>***  | 0.78<br>*** | -0.13       | 0.75<br>*** | 0.60<br>***   | 1.00                           |

<sup>1</sup> \*\* and \*\*\* represents p-values <0.01 and <0.001 respectively.

Online Supporting Material

Supplemental Table 4: Spearman's rank correlation of PPAR $\gamma$ -associated genes in mesenteric adipose tissue of BCO2-KO mice.<sup>1</sup>

| R <sup>2</sup>                 | <i>Cidea</i>     | <i>Cysc</i>      | <i>Dgat</i> | <i>Lpl</i>  | <i>Pck1</i> | <i>Pgc1a</i> | <i>PPAR<math>\gamma</math></i> | <i>Prdm16</i> | <i>Slc2a4</i> | <i>Ucp1</i> | <i>Ucp3</i> |
|--------------------------------|------------------|------------------|-------------|-------------|-------------|--------------|--------------------------------|---------------|---------------|-------------|-------------|
| <i>Cidea</i>                   | 1.00             |                  |             |             |             |              |                                |               |               |             |             |
| <i>Cysc</i>                    | 0.67<br>***      | 1.00             |             |             |             |              |                                |               |               |             |             |
| <i>Dgat</i>                    | 0.32<br>*        | 0.43<br>**       | 1.00        |             |             |              |                                |               |               |             |             |
| <i>Lpl</i>                     | 0.26<br>(p=0.06) | 0.28<br>(p=0.06) | 0.22        | 1.00        |             |              |                                |               |               |             |             |
| <i>Pck1</i>                    | 0.34<br>*        | 0.30<br>*        | 0.54<br>*** | -0.08       | 1.00        |              |                                |               |               |             |             |
| <i>Pgc1a</i>                   | 0.56<br>***      | 0.75<br>***      | 0.43<br>**  | 0.11        | 0.30<br>*   | 1.00         |                                |               |               |             |             |
| <i>PPAR<math>\gamma</math></i> | 0.56<br>***      | 0.58<br>***      | 0.58<br>*** | 0.63<br>*** | 0.56<br>*** | 0.67<br>***  | 1.00                           |               |               |             |             |
| <i>Prdm16</i>                  | 0.65<br>***      | 0.67<br>***      | 0.60<br>*** | 0.56<br>*** | 0.44<br>**  | 0.67<br>***  | 0.75<br>***                    | 1.00          |               |             |             |
| <i>Slc2a4</i>                  | 0.47<br>***      | 0.62<br>***      | 0.65<br>*** | 0.06        | 0.35<br>*   | 0.73<br>***  | 0.75<br>***                    | 0.52<br>***   | 1.00          |             |             |
| <i>Ucp1</i>                    | 0.41<br>***      | 0.61<br>***      | 0.34<br>*   | 0.36<br>*   | 0.17        | 0.39<br>*    | 0.49<br>**                     | 0.35<br>**    | 0.31<br>*     | 1.00        |             |
| <i>Ucp3</i>                    | 0.44<br>**       | 0.54<br>***      | 0.49<br>**  | 0.39<br>*   | 0.39<br>*   | 0.62<br>***  | 0.80<br>***                    | 0.42<br>**    | 0.63<br>***   | 0.47<br>**  | 1.00        |

<sup>1</sup> \*, \*\* and \*\*\* represents p-values <0.05, <0.01 and <0.001 respectively.
